# Supplementary material for: Sphingosine-1-phosphate receptor-2 deficiency leads to inhibition of macrophage proinflammatory activities and atherosclerosis in apoE-deficient mice
Source: JCI journal article supplement (doi:10.1172/jci42315), 2010-11-01
Supplement: sd1 [file 1]

## Supplementary Table 1

Viability is reduced in mice with *S1pr2* mutation.

| Genetic background | Age                    | Matings<br>(F × M) | Number of postnatal mice | S1pr2 Genotype (percentage) |         |        |
|--------------------|------------------------|--------------------|--------------------------|-----------------------------|---------|--------|
|                    |                        |                    |                          | +/+                         | +/-     | -/-    |
| F1N3               | 4 weeks<br>after birth | +/- × +/-          | 179                      | 49(27)                      | 102(57) | 28(16) |
| F1N7               | 4 weeks<br>after birth | +/- × +/-          | 122                      | 45(37)                      | 69(57)  | 8(6)   |

The total number and percentage of mice from *S1pr2*<sup>+/-</sup>*Apoe*<sup>-/-</sup> crosses identified in each generation at week 4. In F1N7 generation, only 6% of the offspring were homozygous for *S1pr2*, which was much less than the expected value of 25%, while the percentage of *S1pr2*<sup>+/-</sup>*Apoe*<sup>-/-</sup> mice in F1N3 generation was 16%.

## Supplementary Table 2

### Plasma cholesterol, triglyceride, and S1P levels in *S1pr2<sup>+/+</sup>Apoe<sup>-/-</sup>* and *S1pr2<sup>-/-</sup>Apoe<sup>-/-</sup>* mice

| Genotype                                          | n | Total Cholesterol<br>(mg/dl) | Triglyceride<br>(mg/dl) | Sphingosine-1-phosphate<br>(nM) |
|---------------------------------------------------|---|------------------------------|-------------------------|---------------------------------|
| <i>S1pr2<sup>+/+</sup><br/>Apoe<sup>-/-</sup></i> | 6 | 1492 ± 284                   | 154 ± 23                | 778 ± 56                        |
| <i>S1pr2<sup>-/-</sup><br/>Apoe<sup>-/-</sup></i> | 5 | 1549 ± 291                   | 107 ± 22                | 786 ± 112                       |

Mice (F1N3 background) were fed HCD for 12 weeks. All data are expressed as means ± SEM.

### Supplementary Table 3

#### Body weight and food intake

| Genotype                                                | n  | Body Weight<br>(6-week old / 18-week old)*<br>(g) | Food Intake<br>(g / 30g BW)# |
|---------------------------------------------------------|----|---------------------------------------------------|------------------------------|
| <i>S1pr2<sup>+/+</sup></i><br><i>Apoe<sup>-/-</sup></i> | 11 | 21 ± 4 / 32 ± 4                                   | 6.4 ± 1.6                    |
| <i>S1pr2<sup>-/-</sup></i><br><i>Apoe<sup>-/-</sup></i> | 8  | 19 ± 4 / 29 ± 5                                   | 5.9 ± 2.1                    |

\*HCD started at 6-week old and ended at 18-week old.

#BW, body weight; food intake was corrected for body weight.

All mice were from F1N3, and the results are presented as means ± SEM.

## Supplementary Table 4

### Peripheral blood counts of erythrocytes and leukocytes

|                            | n | rbc*                                    | Leukocyte cell                          | Differential White Blood Cell Count(%) |               |                |
|----------------------------|---|-----------------------------------------|-----------------------------------------|----------------------------------------|---------------|----------------|
|                            |   | Number<br>( $\times 10^4/\text{mm}^3$ ) | Number<br>( $\times 10^2/\text{mm}^3$ ) | Lymphocyte                             | Monocyte      | Neutrophil     |
| <i>S1pr2<sup>+/+</sup></i> | 8 | 691 $\pm$ 50                            | 35 $\pm$ 3                              | 78.5 $\pm$ 2.4                         | 2.5 $\pm$ 0.7 | 18.1 $\pm$ 2.0 |
| <i>Apoe<sup>-/-</sup></i>  |   |                                         |                                         |                                        |               |                |
| <i>S1pr2<sup>-/-</sup></i> | 7 | 735 $\pm$ 78                            | 37 $\pm$ 6                              | 83.7 $\pm$ 1.3                         | 3.2 $\pm$ 1.1 | 12.3 $\pm$ 2.2 |
| <i>Apoe<sup>-/-</sup></i>  |   |                                         |                                         |                                        |               |                |

\*rbc= red blood cell

All results are presented as means  $\pm$  SEM.

Mice (F1N3 background) were fed HCD for 12 weeks.

## Supplementary Table 5

### RT-PCR primers

| Gene symbol |   | Primer sequence (5' to 3') | Annealing temp.*<br>(°C) | Product size<br>(bp) |
|-------------|---|----------------------------|--------------------------|----------------------|
| S1pr1       | F | TCCATGTAAACTGGGTCAAG       | 60                       | 315                  |
|             | R | AAAGGTGCTGTAGGGGTTAG       |                          |                      |
| S1pr2       | F | TTTTAAAATTGGGACAGGGT       | 60                       | 258                  |
|             | R | TTCTCCACAGGATTTAGCAA       |                          |                      |
| S1pr3       | F | ATGGCATTGCTCTTGTTTA        | 60                       | 234                  |
|             | R | TATTTTTCCCTTAACCCAGC       |                          |                      |
| S1pr4       | F | AACTGTGGGTATGACTCTGG       | 60                       | 190                  |
|             | R | ATACAGTTGGAACAGTTGGG       |                          |                      |
| S1pr5       | F | CTAGGTCTGGAAATTTGGCT       | 60                       | 319                  |
|             | R | AACTGAAGTTGCCAGAATCA       |                          |                      |
| Vcam1       | F | GCAGAGACTTGAAATGCCTGTG     | 57                       | 340                  |
|             | R | CTTCGTTCCAGCTTCCCAGAGCC    |                          |                      |
| Icam1       | F | TGCGTTTTGGAGCTAGCGGACCA    | 60                       | 300                  |
|             | R | CGAGGACCATACAGCACGTGCAG    |                          |                      |
| Gapdh       | F | TGATGGGTGTGAACCACGAG       | 54                       | 521                  |
|             | R | GTCATTGAGAGCAATGCCAG       |                          |                      |

\* temp.=temperature. F, forward primer. R, reverse primer.

## Supplementary Table 6

### Real-time PCR primers

| Gene symbol          | ID number     |
|----------------------|---------------|
| Tnf                  | Mm00443258_m1 |
| Il6                  | Mm00446190_m1 |
| Cd36                 | Mm00432403_m1 |
| Scara                | Mm01313828_m1 |
| Scarb1               | Mm00450236_m1 |
| S1pr1                | Mm00514644_m1 |
| S1pr2                | Mm02620208_m1 |
| S1pr3                | Mm00515669_m1 |
| Sphk1                | Mm00448841_m1 |
| Sphk2                | Mm00445020_m1 |
| Spp1                 | Mm00473016_m1 |
| Spl1                 | Mm00486079_m1 |
| Ccl2                 | Mm99999056_m1 |
| Abca1                | Mm00442663_m1 |
| Abcg1                | Mm00437390_m1 |
| Ifng                 | Mm99999071_m1 |
| Pparg                | Mm01184323_m1 |
| Vcam1                | Mm01320970_m1 |
| Icam1                | Mm00516024_m1 |
| Nr1h3(LXR $\alpha$ ) | Mm00443454_m1 |
| Nr1h2(LXR $\beta$ )  | Mm00437265_m1 |
| Csf2(GM-CSF)         | Mm01290062_m1 |
| CD3e                 | Mm01179194_m1 |
| IL10                 | Mm00439614_m1 |
| 18S rRNA             | Hs99999901_s1 |

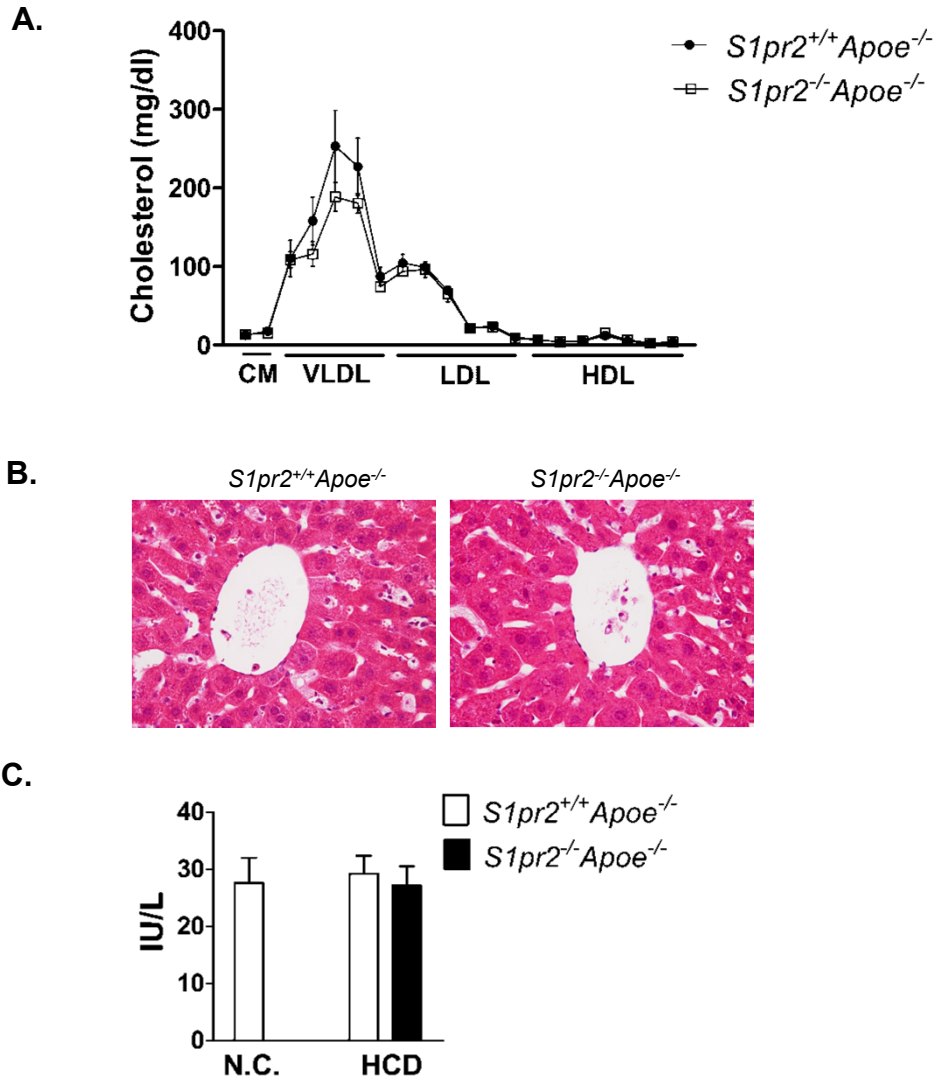

**Supplementary Figure 1.**

(A) Distribution of cholesterol in the plasma of *S1pr2*<sup>+/+</sup>*Apoe*<sup>-/-</sup> (closed circle) and *S1pr2*<sup>-/-</sup>*Apoe*<sup>-/-</sup> (open square) mice fed with HCD for 12 weeks. No difference in the distribution of cholesterol in plasma lipoproteins was detected (CM: chylomicron). (B) H&E staining of sections of livers isolated from *S1pr2*<sup>+/+</sup>*Apoe*<sup>-/-</sup> and *S1pr2*<sup>-/-</sup>*Apoe*<sup>-/-</sup> mice fed with HCD. (C) Serum ALT levels in *S1pr2*<sup>+/+</sup>*Apoe*<sup>-/-</sup> (closed circle) and *S1pr2*<sup>-/-</sup>*Apoe*<sup>-/-</sup> (open square) mice fed with HCD and *S1pr2*<sup>+/+</sup>*Apoe*<sup>-/-</sup> fed with normal chow (N.C.). (n=5 each).

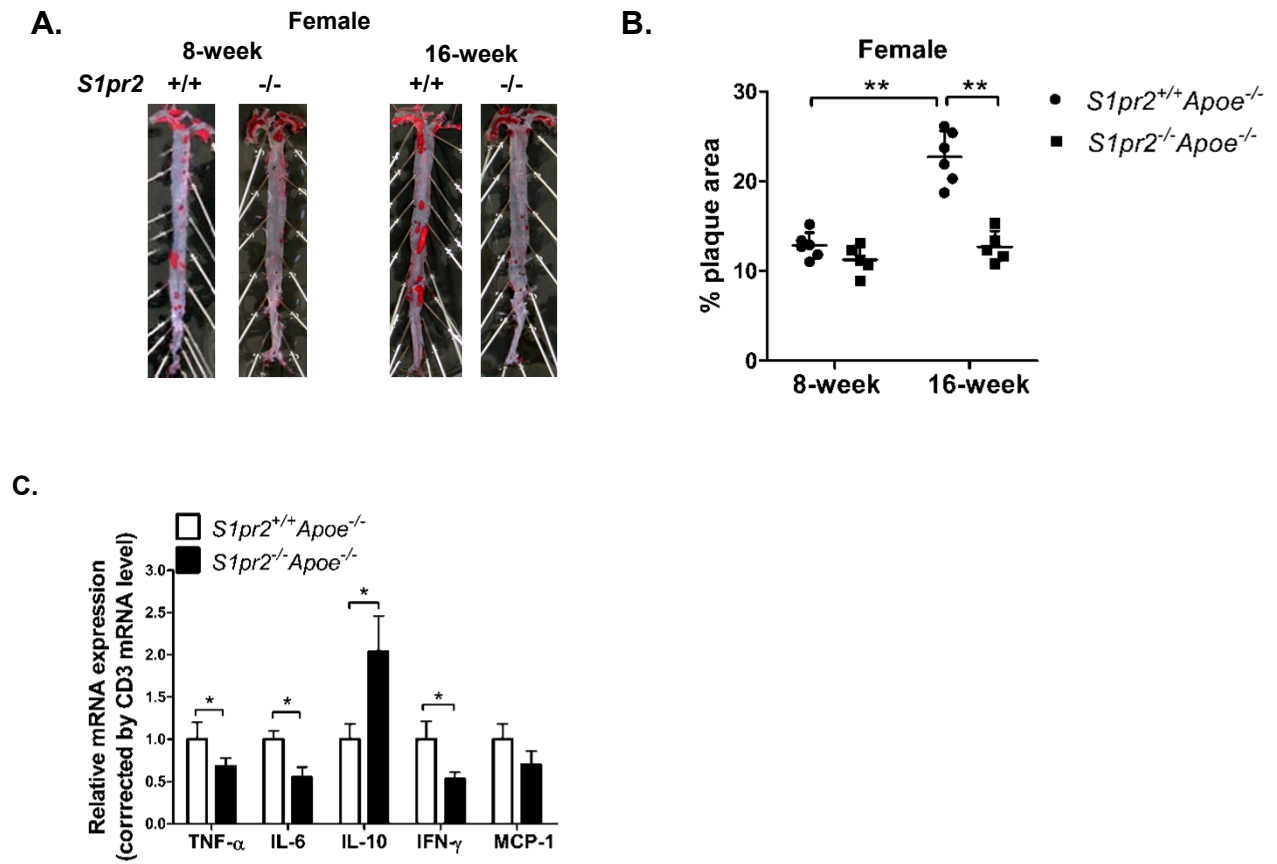

## Supplementary Figure 2.

(A) Representative Oil red O staining of spread aortas from *S1pr2*<sup>+/+</sup>*ApoE*<sup>-/-</sup> ( $n=12$ ) and *S1pr2*<sup>-/-</sup>*ApoE*<sup>-/-</sup> ( $n=10$ ) female mice (N3 generation) fed HCD for 8 and 16 weeks. (B) Quantified plaque areas over total aortic areas are shown.  $**P<0.01$ . (C) The mRNA expression levels of TNF- $\alpha$ , IL-6, IL-10, IFN- $\gamma$  and MCP-1 that were corrected by CD3 mRNA levels ( $n=5$  each).



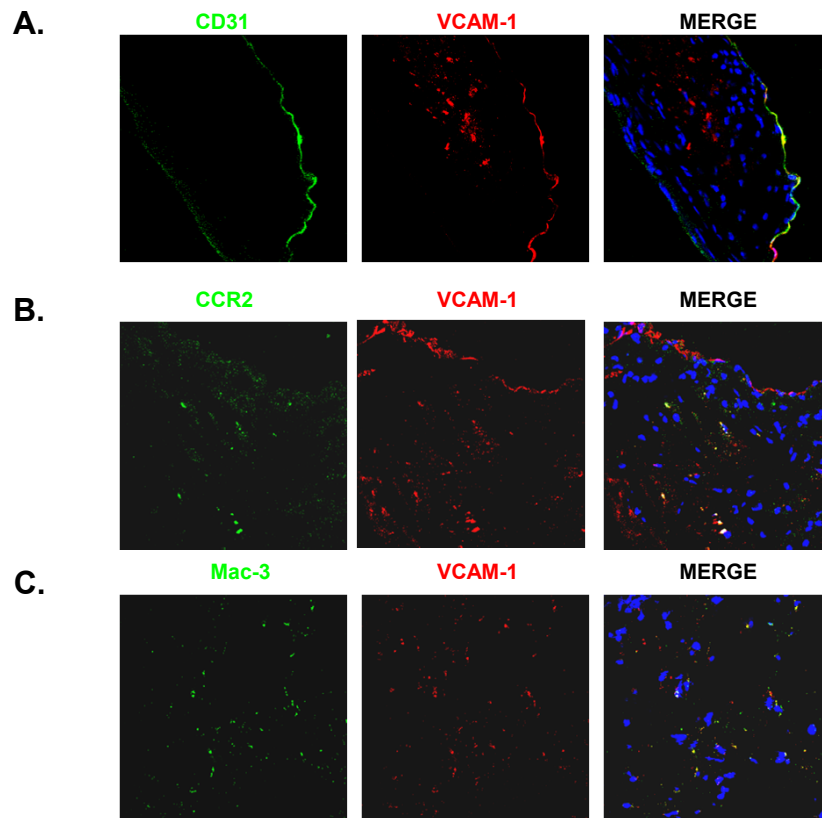

**Supplementary Figure 3.**

**(A-C)** Colocalization staining of ECs, Macrophages. **(A)** CD31(green), VCAM-1(red) stainings colocalized ECs. **(B)** Freshly migrated macrophages are shown by costaining CCR2(green) and VCAM-1(red). **(C)** Macrophages are shown by staining Mac-3(green) and VCAM-1(red).

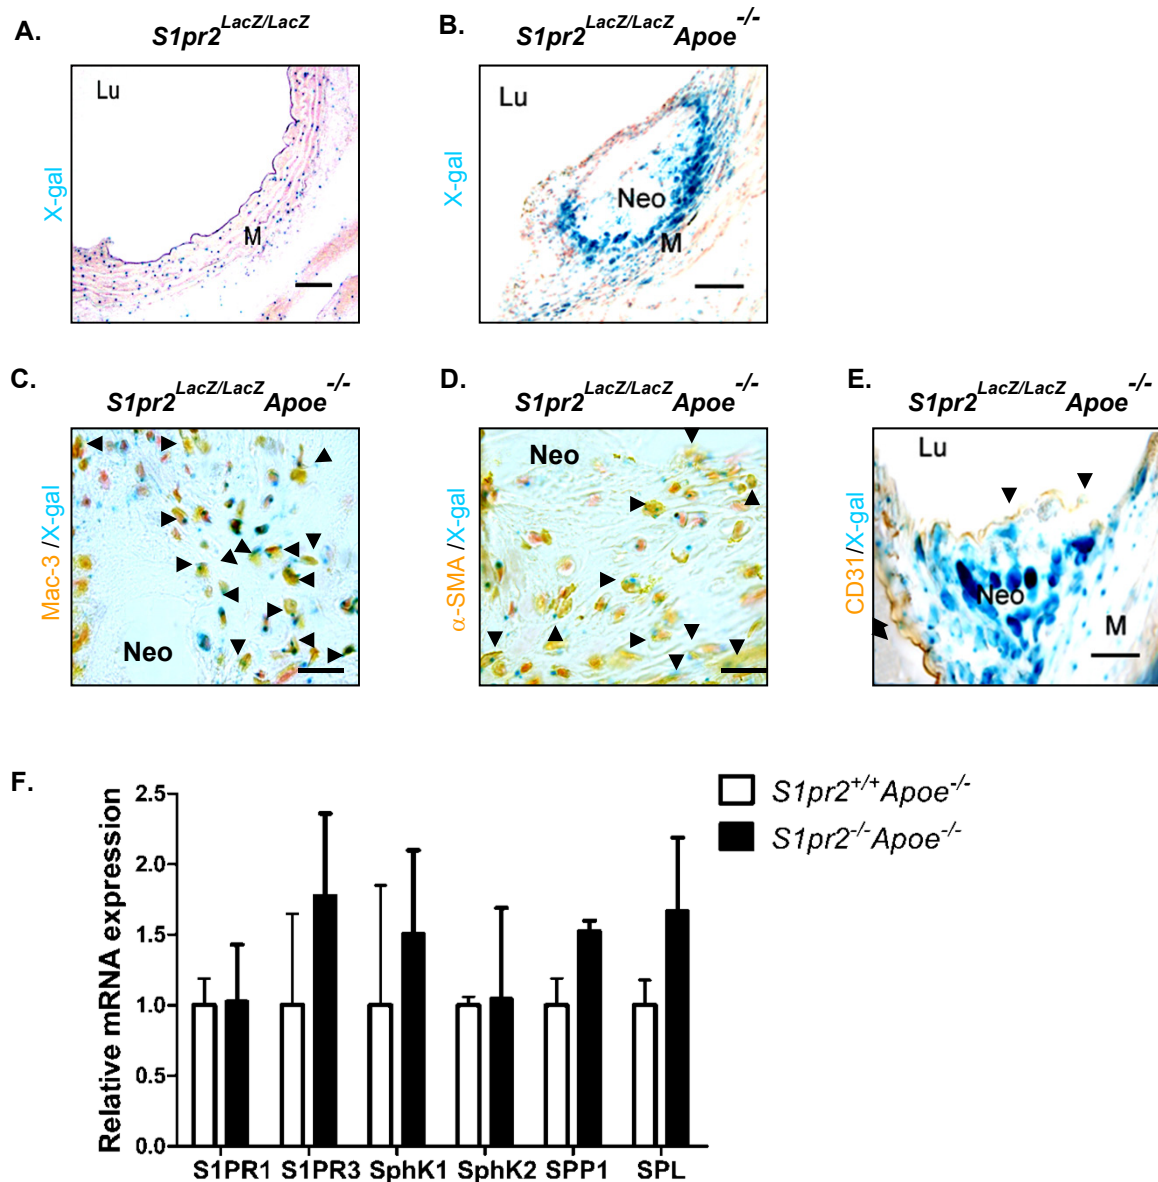

#### Supplementary Figure 4.

Expression of S1PR2 in normal and atherosclerotic aortas detected by LacZ activity in  $S1pr2^{LacZ/LacZ}Apoe^{+/+}$  and  $S1pr2^{LacZ/LacZ}Apoe^{-/-}$  mice. (A) X-gal (blue) staining of a cross section of the normal abdominal aorta from  $S1pr2^{LacZ/LacZ}Apoe^{+/+}$  mice showing that S1PR2 is expressed in both ECs and SMCs. (B-D) Histological staining of the atherosclerotic aortas from  $S1pr2^{LacZ/LacZ}Apoe^{-/-}$  mice fed HCD for 12 weeks. X-gal staining of a cross section of the atherosclerotic aorta (B), X-gal and anti-Mac-3 (brown) double staining of the aortic sinus (C), X-gal and anti- $\alpha$ -SMA (brown) double staining of the aortic sinus (D), and X-gal and anti-CD31 (brown) double staining of the aortic sinus (E). Lu: lumen; M: media; Neo: neointima. Black arrowheads in (C-E) show LacZ-positive macrophages, smooth muscle cells and ECs, respectively. Cell nuclei are counterstained by nuclear fast red (pink). Scale bars: 50  $\mu$ m. (F) The mRNA expression of S1P receptors, S1P synthesizing and degrading enzymes in the aortas from  $S1pr2^{+/+}Apoe^{-/-}$  (open bar) and  $S1pr2^{-/-}Apoe^{-/-}$  (closed bar) mice. The mRNA expression levels were determined by real-time PCR. 18S rRNA was used as an internal control. Data are expressed as the ratio of the values in  $S1pr2^{-/-}Apoe^{-/-}$  mice over  $S1pr2^{+/+}Apoe^{-/-}$  mice ( $n=3$  each).

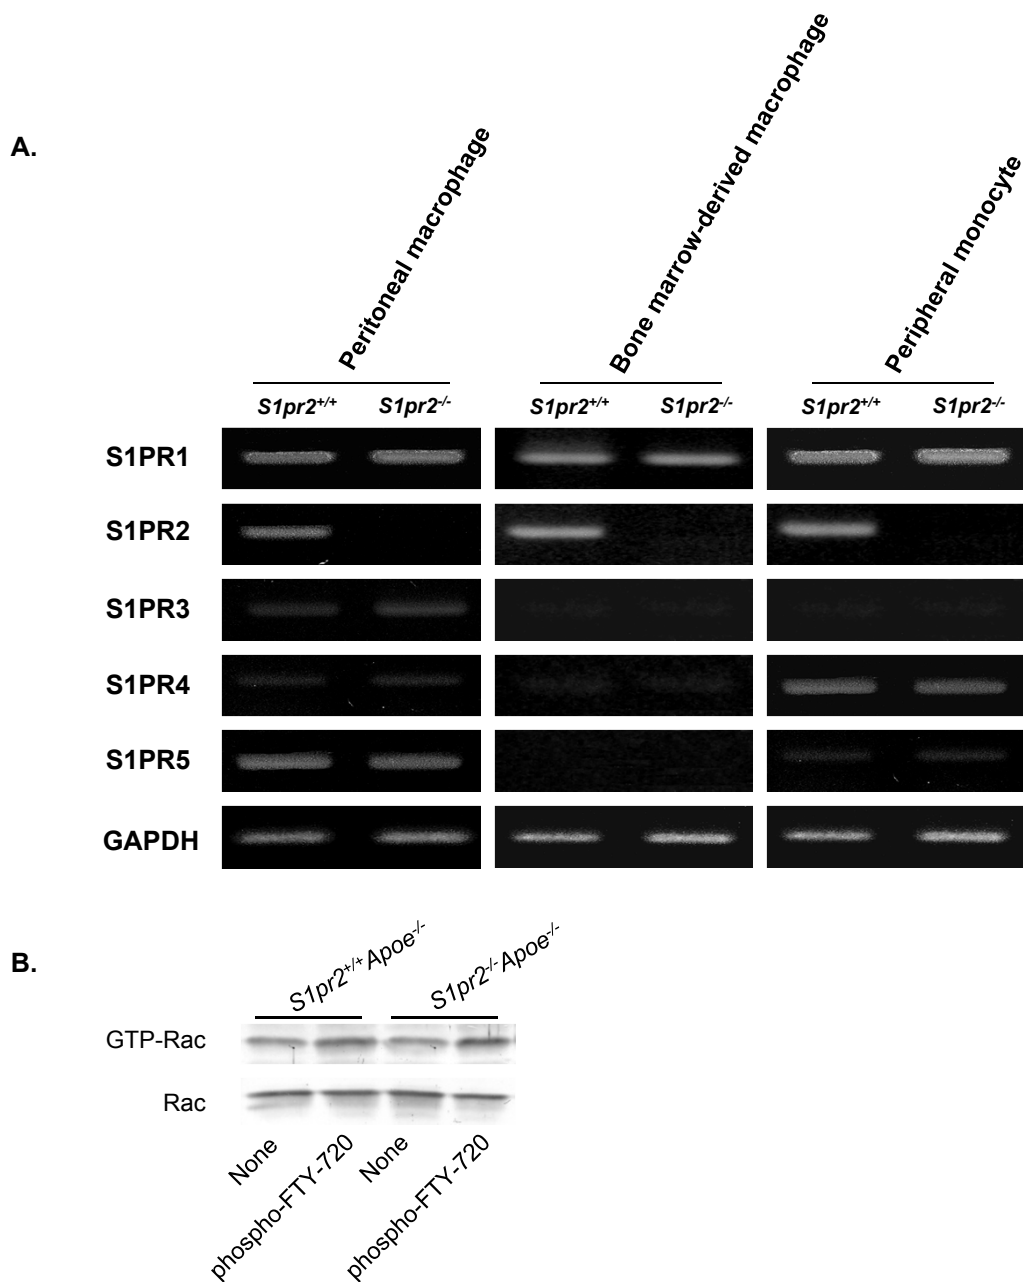

### Supplementary Figure 5.

The expression of S1P receptor mRNA in monocytes/macrophages and the Rac response to FTY-720 phosphate in macrophages. **(A)** The expression of S1P receptor mRNA in peritoneal macrophages, BM-derived macrophages, and peripheral blood monocytes from *S1pr2*<sup>+/+</sup>*Apoe*<sup>-/-</sup> and *S1pr2*<sup>-/-</sup>*Apoe*<sup>-/-</sup> mice. The mRNA expression levels of S1P receptors were determined by semi-quantitative RT-PCR. GAPDH was used as an internal control. Similar results were obtained in three different experiments. **(B)** S1PR2 deletion does not alter S1PR1-dependent Rac activation by phosphorylated FTY-720. Serum-starved peritoneal macrophages isolated from *S1pr2*<sup>+/+</sup>*Apoe*<sup>-/-</sup> and *S1pr2*<sup>-/-</sup>*Apoe*<sup>-/-</sup> mice were stimulated with phosphorylated FTY-720 (1 μM) for 10 min and subjected to pulldown assay for GTP-Rac.

**A.**

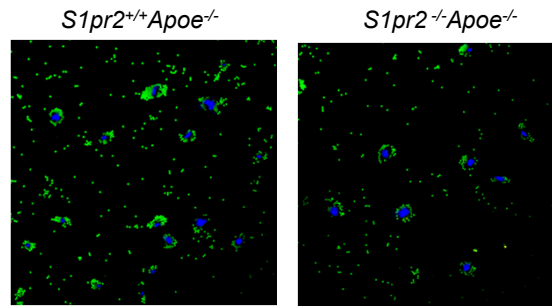

**B.**

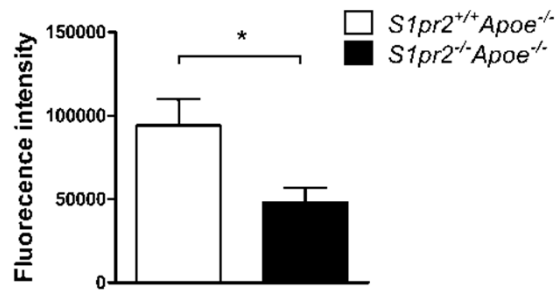

**Supplementary Figure 6.**

(A) Decreased phagocytosis in *S1pr2<sup>-/-</sup>Apoe<sup>-/-</sup>* macrophage. Macrophages from *S1pr2<sup>+/+</sup>Apoe<sup>-/-</sup>*, and *S1pr2<sup>-/-</sup>Apoe<sup>-/-</sup>* mice were incubated with fluorescent polystyrene microspheres, fluoresbrite carboxylate, for 1 hour at 37°C. Scale bars: 20 µm. (B) Quantified data of beads uptake is shown. (n=3 each). \**P*<0.05.

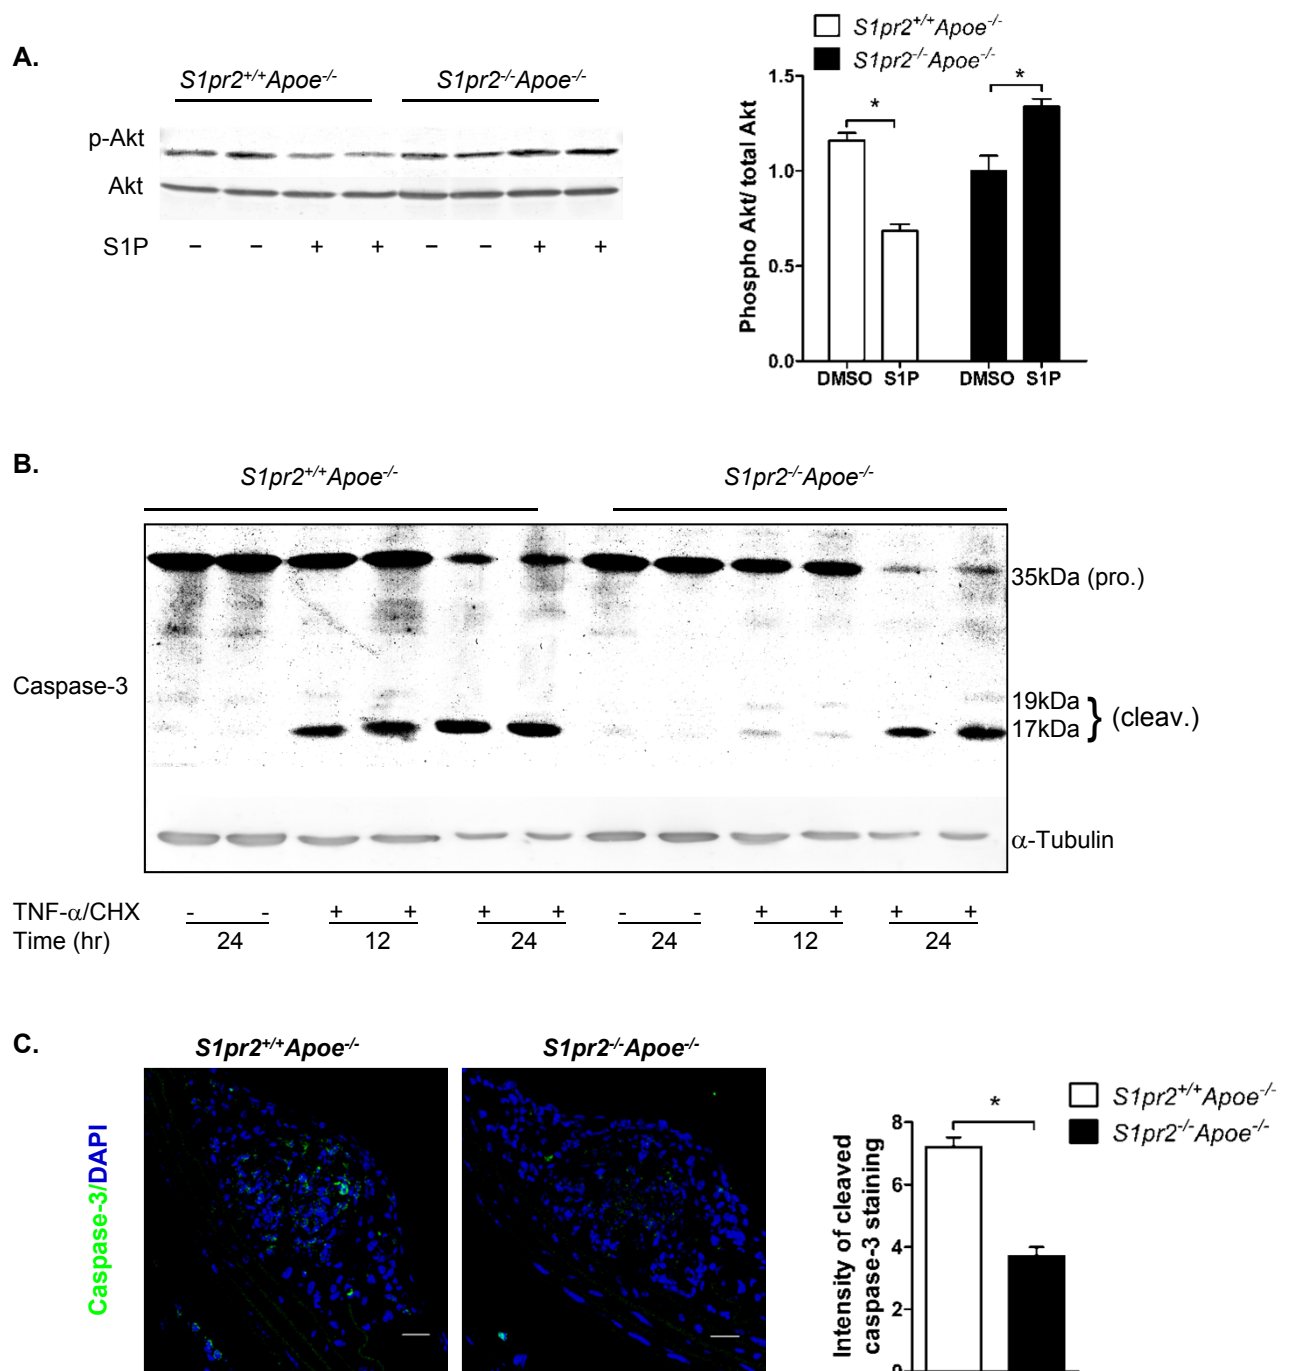

### Supplementary Figure 7.

Effects of S1PR2 deficiency on macrophage apoptosis in peritoneal macrophages and plaque lesions in the aorta. **(A)** Phosphorylation of Akt in peritoneal macrophages from *S1pr2*<sup>+/+</sup>*Apoe*<sup>-/-</sup> (open bar) and *S1pr2*<sup>-/-</sup>*Apoe*<sup>-/-</sup> (closed bar) mice. The cells were serum-starved for 15 hours and then stimulated with S1P (0.1  $\mu$ M) for 15 minutes. Cell lysates were subjected to Western blotting using antibodies against phospho-Akt and total Akt. Quantified data of band density are shown (right). ( $n=3$  each).  $*P<0.05$ . **(B)** Caspase-3 activation in peritoneal macrophages from *S1pr2*<sup>+/+</sup>*Apoe*<sup>-/-</sup> (left panel) and *S1pr2*<sup>-/-</sup>*Apoe*<sup>-/-</sup> (right panel) mice. The cells were treated with TNF- $\alpha$ (10 ng/ml) and cycloheximide (10  $\mu$ g/ml) for 12 or 24 hours. Caspase-3 activation was determined by Western blotting using anti-caspase-3 antibody that recognizes both pro-caspase-3 and cleaved caspase-3.  $\alpha$ -Tubulin was used as an internal control. The similar observations as those in **(A)** and **(B)** were also made in bone marrow-derived macrophages. **(C)** Immunostaining using anti-cleaved caspase-3 of the atherosclerotic aortas from *S1pr2*<sup>+/+</sup>*Apoe*<sup>-/-</sup> (left panel) and *S1pr2*<sup>-/-</sup>*Apoe*<sup>-/-</sup> (right panel) mice ( $n=3$  each). Quantified data of cleaved caspase-3-positive cells are shown (left). Scale bars: 50  $\mu$ m.  $*P<0.05$ .

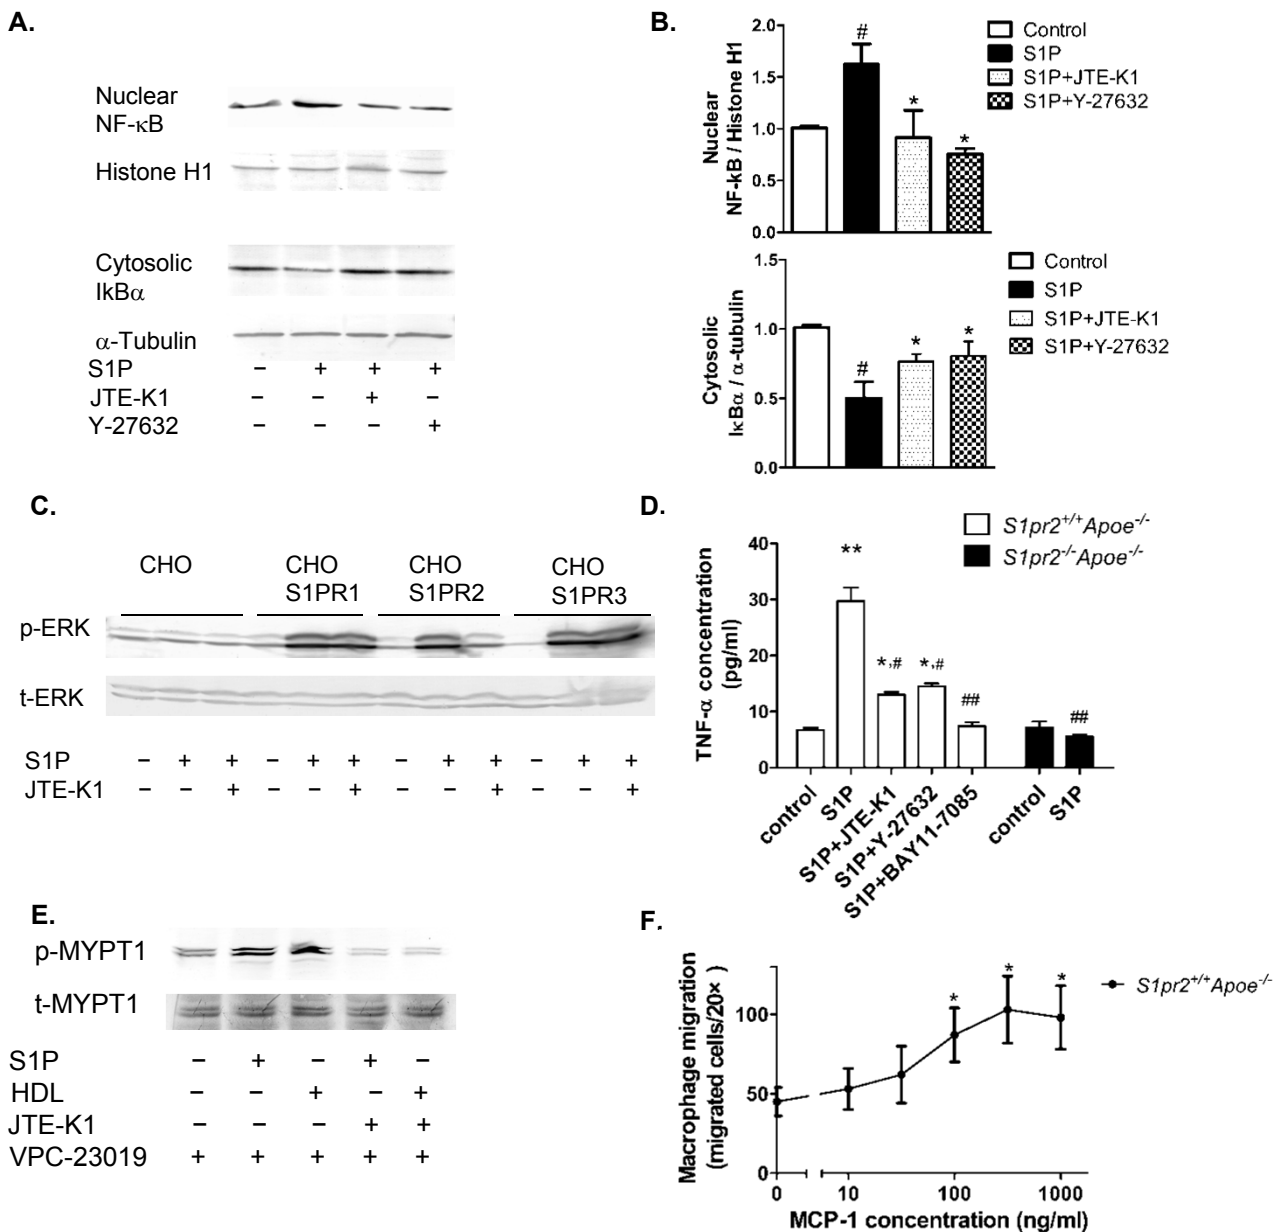

### Supplementary Figure 8.

S1P induces nuclear translocation of NF-κB (p65RelA). **(A)** Peritoneal macrophages from *S1pr2<sup>+/+</sup>Apoe<sup>-/-</sup>* mice were stimulated with 0.1 μM S1P in the presence and absence of 1 μM JTE-K1 or 10 μM Y-27632 for 2 hours. Nuclear and cytosolic extracts were subjected to Western blotting using anti-p65RelA antibody and anti-IκBα antibody. Histone H1 and α-tubulin were used as nuclear and cytosolic internal controls, respectively. **(B)** Quantified data of NF-κB protein in nucleus and IκBα in cytosol. *n*=3 each. \**P*<0.05 compared with S1P-treated macrophages, #*P*<0.05 compared with non-treated macrophages. **(C)** JTE-K1 specifically inhibits S1PR2-, but not S1PR1- or S1PR3- mediated ERK activation. The CHO cells expressing each receptor were pretreated with JTE-K1 (1 μM) for 10 minutes and stimulated with S1P (0.1 μM) for 5 minutes. **(D)** TNF-α secretion by *S1pr2<sup>+/+</sup>Apoe<sup>-/-</sup>* and *S1pr2<sup>-/-</sup>Apoe<sup>-/-</sup>* macrophages. Macrophages pretreated with either JTE-K1(1 μM), Y-27632(10 μM), or BAY11-7085(10 μM) or untreated were stimulated with S1P for 12 hours. TNF-α protein levels were measured by using ELISA. (*n*=3 each). \**P*<0.05 compared with non-treated macrophages, #*P*<0.05 compared with S1P-treated macrophages. **(E)** Stimulation of MYPT1 phosphorylation by HDL via S1PR2 and ROCK. *S1pr2<sup>+/+</sup>Apoe<sup>-/-</sup>* macrophages were pretreated with VPC23019 (1 μM) or JTE-K1 (1 μM) for 10 minutes before the addition of S1P (0.1 μM) or HDL (0.45 mg/ml), which contains the equivalent concentration of S1P, for 5 minutes. **(F)** MCP-1 stimulates chemotaxis of *S1pr2<sup>+/+</sup>Apoe<sup>-/-</sup>* macrophages in the presence of various concentrations of MCP-1 in the lower well of the modified Boyden chamber. (*n*=3 each). \**P*<0.05.

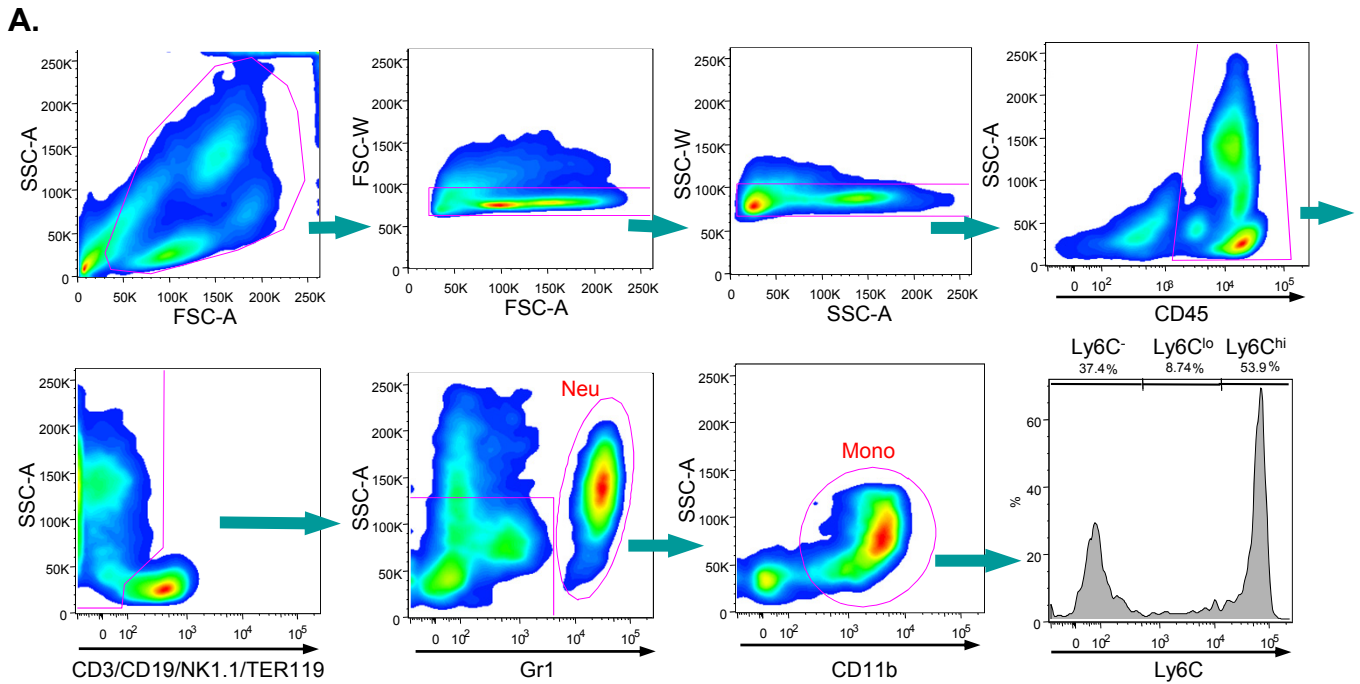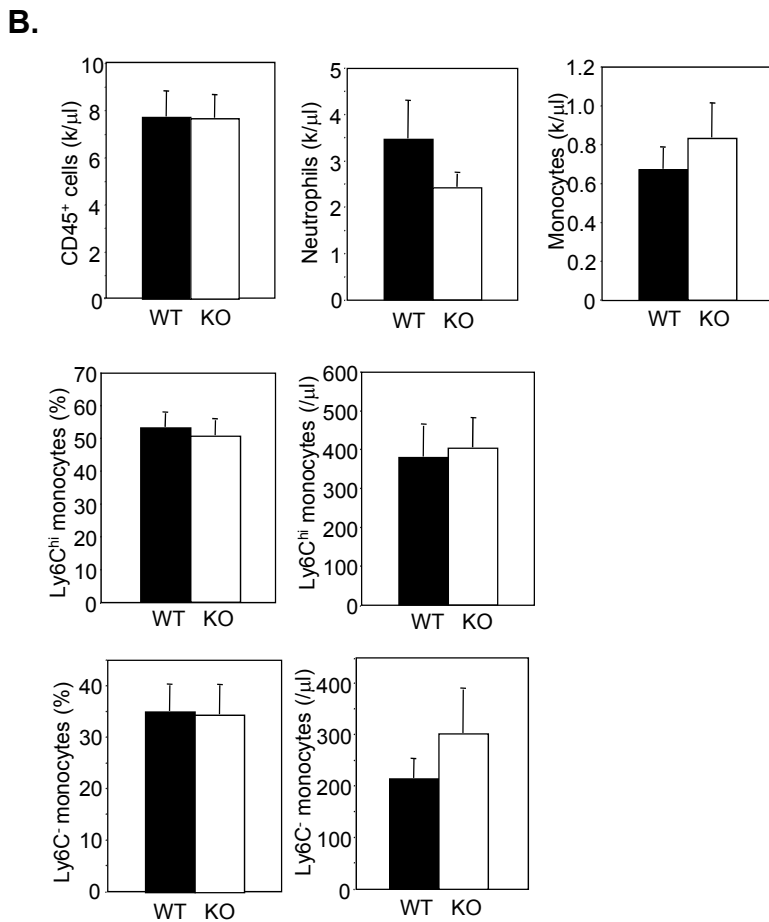

**Supplementary Figure 9.**

CD11b<sup>+</sup>Ly6C<sup>hi</sup> proinflammatory monocyte subset is not different between *S1pr2*<sup>+/+</sup>*ApoE*<sup>-/-</sup> and *S1pr2*<sup>-/-</sup>*ApoE*<sup>-/-</sup> mice. We examined surface markers in peripheral blood monocyte to examine the activation state by flow cytometry. Peripheral blood neutrophils and monocytes were defined as CD45<sup>+</sup>CD11b<sup>+</sup>Gr1<sup>+</sup>CD3<sup>-</sup>CD19<sup>-</sup>NK1.1<sup>-</sup> and CD45<sup>+</sup>CD11b<sup>+</sup>Gr1<sup>-</sup>CD3<sup>-</sup>CD19<sup>-</sup>NK1.1<sup>-</sup>, respectively. **(A)** Scheme of CD11b<sup>+</sup>Ly6C<sup>hi</sup> monocyte subset selection processes. **(B)** Quantified data of each population characterized of the indicated surface markers.

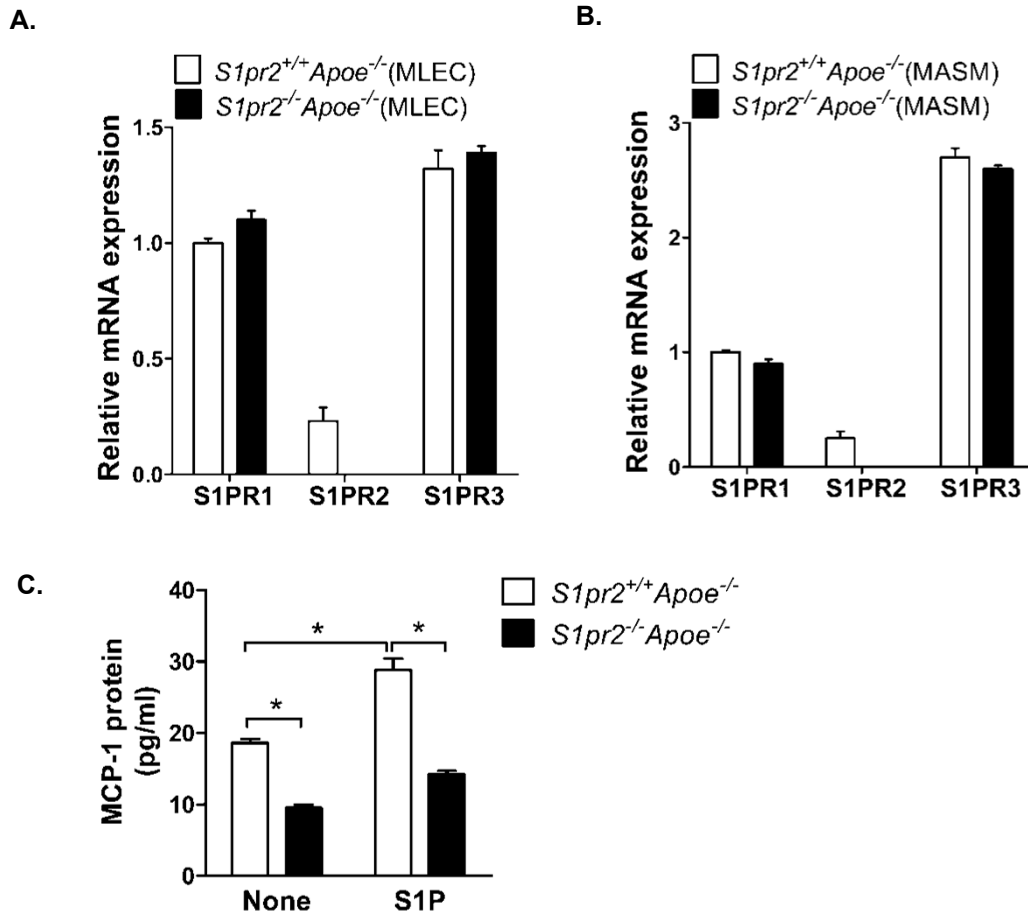

### Supplementary Figure 10.

The expression of S1P receptor mRNA in MLECs (A) and SMCs (B) from  $S1pr2^{+/+}Apoe^{-/-}$  and  $S1pr2^{-/-}Apoe^{-/-}$  mice ( $n=3$  each). The mRNA expression of S1P receptors was determined by real-time PCR. 18S rRNA was used as an internal control. Data are expressed as the ratio of the values in  $S1pr2^{-/-}Apoe^{-/-}$  mice over S1PR1 mRNA level in  $S1pr2^{+/+}Apoe^{-/-}$  mice. (C) MCP-1 secretion by MLECs. MLECs isolated from  $S1pr2^{+/+}Apoe^{-/-}$  and  $S1pr2^{-/-}Apoe^{-/-}$  mice, treated with or without S1P(0.1  $\mu$ M) for 12 hours. MCP-1 protein levels were measured using ELISA. ( $n=3$  each). \* $P < 0.05$ .
